# Supplementary material
Source: PubMed Central journal article supplement (PMC4135637)
Supplement: JB.01820-14_zjb999093255so1.pdf [file JB.01820-14_zjb999093255so1.pdf]

| Organism                | Pubmed ID | Citation                                    | Distance                                                                                                                             | Clustering       | Software                 |
|-------------------------|-----------|---------------------------------------------|--------------------------------------------------------------------------------------------------------------------------------------|------------------|--------------------------|
| <i>M. tuberculosis</i>  | 22984400  | PLoS One. 2012;7(9):e41991                  | Categorical                                                                                                                          | Bayesian (& MST) | MrBayes3 (& BioNumerics) |
| <i>S. Enteritidis</i>   | 23096767  | Trop Anim Health Prod. 2012 Oct 25          | Categorical                                                                                                                          | Not specified    | BioNumerics              |
| <i>L. interrogans</i>   | 23122311  | Biomed Environ Sci. 2012 Oct;25(5):542-8    | Categorical                                                                                                                          | UPGMA            | BioNumerics              |
| <i>Y. pestis</i>        | 23079835  | Genet Mol Res. 2012 Sep 25;11(3):3414-24    | Categorical                                                                                                                          | UPGMA            | MEGA                     |
| <i>A. baumannii</i>     | 22984530  | PLoS One. 2012;7(9):e44597                  | Clustering performed but no methods specified                                                                                        |                  |                          |
| <i>C. difficile</i>     | 23052318  | J Clin Microbiol. 2012 Dec;50(12):4078-82   | Consecutive episodes with sum of tandem repeat differences $\leq 2$ were defined as relapses, $\geq 3$ were defined as reinfections. |                  |                          |
| <i>S. aureus</i>        | 23078039  | Clin Microbiol Infect. 2012 Sep 15          | NA; 2 isolates                                                                                                                       |                  |                          |
| <i>S. Typhimurium</i>   | 23153086  | Commun Dis Intell. 2012 Mar 31;36(1):101-6. | NA; all strains differed by $\pm 1$ at single locus                                                                                  |                  |                          |
| <i>S. Enteritidis</i>   | 23091125  | Poult Sci. 2012 Nov;91(11):2727-35          | NA; closely related defined as different at only one locus                                                                           | BioNumerics      |                          |
| <i>S. aureus</i>        | 23100339  | J Clin Microbiol. 2012 Oct 24               | NA; compared only within-patient pairs                                                                                               |                  |                          |
| <i>L. monocytogenes</i> | 22997210  | Clin Infect Dis. 2012 Oct 19                | NA; identical patterns                                                                                                               |                  |                          |
| <i>E. coli</i>          | 23129461  | Eur J Clin Microbiol Infect Dis. 2012 Nov 6 | NA; not compared                                                                                                                     |                  |                          |
| <i>C. burnetii</i>      | 22988998  | BMC Vet Res. 2012 Sep 18                    | NA; small number of profiles, compared manually                                                                                      |                  |                          |

|                                         |          |                                             |                                                    |                                               |                                                            |
|-----------------------------------------|----------|---------------------------------------------|----------------------------------------------------|-----------------------------------------------|------------------------------------------------------------|
| <i>C. burnetii</i>                      | 23040417 | Int J Med Microbiol. 2012 Nov;302(6):253-6  | Not specified                                      | Minimum spanning                              | Not specified                                              |
| <i>S. Enteritidis</i>                   | 23035725 | Foodborne Pathog Dis. 2012 Oct;9(10):885-95 | Not specified                                      | UPGMA                                         | BioNumerics (assumed as data was processed in BioNumerics) |
| <i>Aspergillus flavus</i>               | 23028503 | PLoS One. 2012;7(9):e44204                  | Not specified; assume categorical based on ref. 18 | UPGMA, Minimum spanning tree                  | BioNumerics (assumed as data was processed in BioNumerics) |
| <i>S. pneumoniae</i>                    | 23088225 | BMC Microbiol. 2012 Oct 22;12(1):241        | Simple                                             | Minimum spanning                              | BioNumerics                                                |
| <i>B. henselae</i>                      | 22956995 | PLoS One. 2012;7(8):e43621                  | Simple                                             | NJ (note also did MST with single-locus rule) | R (MST in BioNumerics)                                     |
| <i>S. enterica</i> serovar 4,[5],12:i:- | 22995432 | Euro Surveill. 2012 Sep 13                  | Single or double LV rules                          | Minimum spanning                              | BioNumerics (assumed as data was processed in BioNumerics) |

**Table 1. Summary of 19 studies reporting MLVA data, published in a 4-month period (August – November 2012)**

Clustering using categorical distance: 4

Clustering using simple distance: 3

Clustering results reported but no methods specified: 4

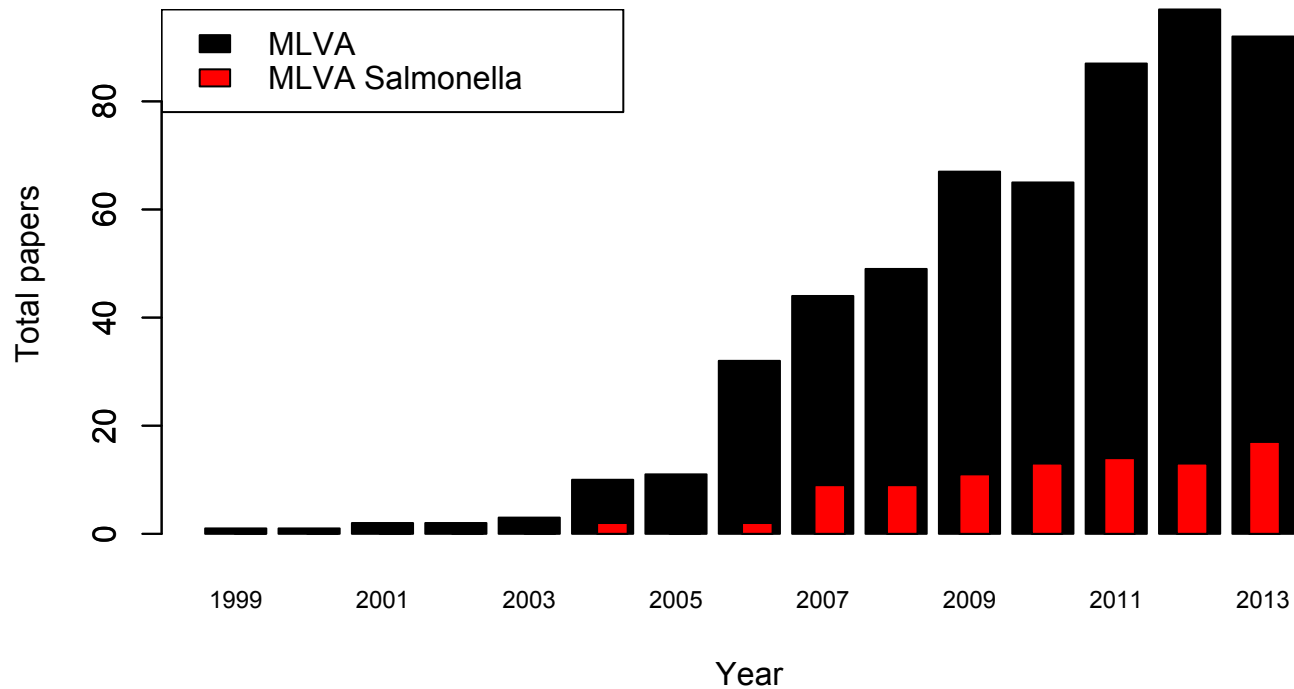

**Figure 1. MLVA papers published (up to November 4, 2013)**

PubMed search was conducted using the search term ‘mlva and ‘mlva salmonella’. For ‘mlva’, 563 results were returned starting in 1999 (a single paper from 1978 described a different use of the abbreviation and was excluded). For ‘mlva salmonella’, a total of 90 results were returned starting in 2004. Results were downloaded in CSV format, year was extracted from the ‘Create date’ field in Excel. Total publication counts per year are shown.
